# Supplementary material
Source: bioRxiv or medRxiv preprint supplement (https://www.biorxiv.org/highwire/filestream/136398/field_highwire_adjunct_files/0/454579-1.pdf)
Supplement: Supplementary file [file 454579-1.pdf]

# **Supplementary Information**

## **Bacteriophages dynamically modulate the gut microbiota and metabolome**

Bryan B. Hsu<sup>1,2</sup>, Travis E. Gibson<sup>3</sup>, Vladimir Yelisseyev<sup>3</sup>, Qing Liu<sup>3</sup>, Lynn Bry<sup>3</sup>,  
Pamela A. Silver<sup>1,2,\*</sup>, Georg K. Gerber<sup>3,\*</sup>

<sup>1</sup>Department of Systems Biology  
Harvard Medical School  
Boston, MA 02115 USA

<sup>2</sup>Wyss Institute for Biologically Inspired Engineering  
Harvard University  
Boston, MA 02115 USA

<sup>3</sup>Massachusetts Host-Microbiome Center, Department of Pathology  
Brigham and Women's Hospital, Harvard Medical School  
Boston, MA 02115 USA

\*Corresponding author:  
pamela\_silver@hms.harvard.edu, ggerber@bwh.harvard.edu

Lead contact: ggerber@bwh.harvard.edu

1 **Table S1 | Host range of phages against infant gut bacteria.** Phages were spotted onto lawns of  
2 each bacteria and incubated anaerobically overnight 37°C. Zones of clearing indicated infectivity. (+) =  
3 lysis; (-) = no lysis

| <i>Bacteria</i>       | <i>Phages</i> |    |       |      |
|-----------------------|---------------|----|-------|------|
|                       | T4            | F1 | B40-8 | VD13 |
| <i>A. muciniphila</i> | -             | -  | -     | -    |
| <i>B. fragilis</i>    | -             | -  | +     | -    |
| <i>B. ovatus</i>      | -             | -  | -     | -    |
| <i>B. vulgatus</i>    | -             | -  | -     | -    |
| <i>C. sporogenes</i>  | -             | +  | -     | -    |
| <i>E. faecalis</i>    | -             | -  | -     | +    |
| <i>E. coli</i>        | +             | -  | -     | -    |
| <i>K. oxytoca</i>     | -             | -  | -     | -    |
| <i>P. distasonis</i>  | -             | -  | -     | -    |
| <i>P. mirabilis</i>   | -             | -  | -     | -    |

4  
5  
6

**Table S2 | Summarized effect of bacteria and phages on fecal metabolites.** Metabolites with significant changes were categorized into KEGG pathway and direction of change (e.g., increase or decrease).

| KEGG Pathway       | Number of screened metabolites | Metabolites significantly changing (adj. <i>p</i> -value < 0.05) |              |            |              |                                           |              |            |              |                                                       |              |            |              |
|--------------------|--------------------------------|------------------------------------------------------------------|--------------|------------|--------------|-------------------------------------------|--------------|------------|--------------|-------------------------------------------------------|--------------|------------|--------------|
|                    |                                | Bacteria only versus GF                                          |              |            |              | +T4/F1 Phages (+13d) versus Bacteria only |              |            |              | +VD13/B40-8 Phages (+13d) versus +T4/F1 Phages (+13d) |              |            |              |
|                    |                                | Decreasing                                                       |              | Increasing |              | Decreasing                                |              | Increasing |              | Decreasing                                            |              | Increasing |              |
|                    |                                | Number                                                           | % of Pathway | Number     | % of Pathway | Number                                    | % of Pathway | Number     | % of Pathway | Number                                                | % of Pathway | Number     | % of Pathway |
| Amino acids        | 203                            | 21                                                               | 10.3%        | 145        | 71.4%        | 3                                         | 1.5%         | 30         | 14.8%        | 5                                                     | 2.5%         | 0          | 0.0%         |
| Peptides           | 37                             | 6                                                                | 16.2%        | 22         | 59.5%        | 2                                         | 5.4%         | 3          | 8.1%         | 0                                                     | 0.0%         | 0          | 0.0%         |
| Carbohydrates      | 31                             | 12                                                               | 38.7%        | 13         | 41.9%        | 4                                         | 12.9%        | 6          | 19.4%        | 0                                                     | 0.0%         | 0          | 0.0%         |
| Energy             | 12                             | 0                                                                | 0.0%         | 7          | 58.3%        | 0                                         | 0.0%         | 0          | 0.0%         | 0                                                     | 0.0%         | 0          | 0.0%         |
| Lipids             | 356                            | 49                                                               | 13.8%        | 193        | 54.2%        | 40                                        | 11.2%        | 13         | 3.7%         | 1                                                     | 0.3%         | 0          | 0.0%         |
| Nucleotides        | 63                             | 18                                                               | 28.6%        | 33         | 52.4%        | 0                                         | 0.0%         | 9          | 14.3%        | 0                                                     | 0.0%         | 0          | 0.0%         |
| Cofactors/Vitamins | 45                             | 6                                                                | 13.3%        | 25         | 55.6%        | 0                                         | 0.0%         | 11         | 24.4%        | 0                                                     | 0.0%         | 0          | 0.0%         |
| Xenobiotics        | 113                            | 15                                                               | 13.3%        | 76         | 67.3%        | 12                                        | 10.6%        | 13         | 11.5%        | 0                                                     | 0.0%         | 0          | 0.0%         |
|                    |                                | 127                                                              | 14.8%        | 514        | 59.8%        | 61                                        | 7.1%         | 85         | 9.9%         | 6                                                     | 0.7%         | 0          | 0.0%         |
| Overall            | 860                            | 641 (74.6%)                                                      |              |            |              | 146 (17.0%)                               |              |            |              | 6 (0.7%)                                              |              |            |              |

**Table S3 | Protein homologs in the defined consortia.** Homologous sequences were identified by protein BLAST against each strain of bacteria in the defined consortia. When strain sequences were unavailable, homology was compared to all species in the non-redundant protein sequences database. (A) Tryptophan decarboxylases that produce tryptamine and (B) tyrosine decarboxylases that produce tyramine.

A

| Bacteria                          | Consortia strain | Homology of tryptophan decarboxylases    |                                     |            |           |             |         |                                             |                                     |            |           |            |         |
|-----------------------------------|------------------|------------------------------------------|-------------------------------------|------------|-----------|-------------|---------|---------------------------------------------|-------------------------------------|------------|-----------|------------|---------|
|                                   |                  | <i>R. gnavus</i> derived (rumgna_01526)  |                                     |            |           |             |         | <i>C. sporogenes</i> derived (clospo_02083) |                                     |            |           |            |         |
|                                   |                  | Strain<br>(or strain of closest homolog) | Sequence ID<br>(or closest homolog) | Percent ID | AA length | Bit Score   | E value | Strain<br>(or strain of closest homolog)    | Sequence ID<br>(or closest homolog) | Percent ID | AA length | Bit Score  | E value |
| <i>Bacteroides fragilis</i>       | HSP40*           | S6L5                                     | EYE60564.1                          | 28%        | 72        | 33.9 (76)   | 2.6     | 3_1_12                                      | EFR53885.1                          | 30%        | 168       | 52.8 (125) | 2E-06   |
| <i>Clostridium sporogenes</i>     | 213*             | Isolate (Accession KRU25053)             | KRU25053.1                          | 27%        | 471       | 157 (398)   | 1E-41   | ATCC 15579                                  | EDU35915.1                          | 100%       | 417       | 864 (2232) | 0       |
| <i>Enterococcus faecalis</i>      | ATCC 29200       | -                                        | -                                   | 0%         | -         | -           | -       | ATCC 29200                                  | EOJ09602.1                          | 28%        | 21        | 53.9 (128) | 1E-06   |
| <i>Escherichia coli</i>           | Nissle 1917      | -                                        | -                                   | 0%         | -         | -           | -       | Nissle 1917                                 | AID78574.1                          | 31%        | 86        | 49.7 (117) | 2E-05   |
| <i>Akkermansia muciniphila</i>    | ATCC BAA-835     | -                                        | -                                   | 0%         | -         | -           | -       | ATCC BAA-835                                | ACD04211.1                          | 25%        | 244       | 59.7 (143) | 1E-08   |
| <i>Bacteroides ovatus</i>         | ATCC 8483        | -                                        | -                                   | 0%         | -         | -           | -       | ATCC 8483                                   | EDO14168.1                          | 30%        | 168       | 52.0 (123) | 4E-06   |
| <i>Bacteroides vulgatus</i>       | ATCC 8482        | -                                        | -                                   | 0%         | -         | -           | -       | ATCC 8482                                   | ABR41498.1                          | 29%        | 165       | 53.5 (127) | 1E-06   |
| <i>Klebsiella oxytoca</i>         | ATCC 700324*     | Isolate (Accession SAP40428)             | SAP40428.1                          | 30%        | 410       | 208 (530)   | 1E-60   | Isolate (Accession SAQ33394)                | SAQ33394.1                          | 28%        | 280       | 106 (256)  | 2E-24   |
| <i>Parabacteroides distasonis</i> | ATCC 8503        | -                                        | -                                   | 0%         | -         | -           | -       | ATCC 8503                                   | ABR42591.1                          | 30%        | 168       | 52.0 (123) | 4E-06   |
| <i>Proteus mirabilis</i>          | ATCC 29906       | -                                        | -                                   | 0%         | -         | -           | -       | ATCC 29906                                  | EEI48912.1                          | 22%        | 357       | 59.7 (143) | 1E-08   |
| <i>Ruminococcus gnavus</i>        | -                | ATCC 29149                               | EDN78222.1                          | 100%       | 490       | 1024 (2647) | 0       | -                                           | -                                   | 0%         | -         | -          | -       |

\* No genome sequence available for this strain so the sequence with greatest homology was used

B

| Bacteria                          | Consortia strain | Homology of tyrosine decarboxylases      |                                     |            |           |             |         |  |
|-----------------------------------|------------------|------------------------------------------|-------------------------------------|------------|-----------|-------------|---------|--|
|                                   |                  | <i>E. faecalis</i> derived (tyrDC)       |                                     |            |           |             |         |  |
|                                   |                  | Strain<br>(or strain of closest homolog) | Sequence ID<br>(or closest homolog) | Percent ID | AA length | Bit Score   | E value |  |
| <i>Bacteroides fragilis</i>       | HSP40*           | -                                        | -                                   | 0%         | -         | -           | -       |  |
| <i>Clostridium sporogenes</i>     | 213*             | ATCC 15579                               | EDU35915.1                          | 28%        | 417       | 60.8 (146)  | 1E-08   |  |
| <i>Enterococcus faecalis</i>      | ATCC 29200       | ATCC 29200                               | EOJ09602.1                          | 100%       | 620       | 1274 (3298) | 0       |  |
| <i>Escherichia coli</i>           | Nissle 1917      | -                                        | -                                   | 0%         | -         | -           | -       |  |
| <i>Akkermansia muciniphila</i>    | ATCC BAA-835     | -                                        | -                                   | 0%         | -         | -           | -       |  |
| <i>Bacteroides ovatus</i>         | ATCC 8483        | -                                        | -                                   | 0%         | -         | -           | -       |  |
| <i>Bacteroides vulgatus</i>       | ATCC 8482        | -                                        | -                                   | 0%         | -         | -           | -       |  |
| <i>Klebsiella oxytoca</i>         | ATCC 700324*     | Isolate (Accession FKZE01000017)         | SAQ17440.1                          | 29%        | 489       | 73.9 (180)  | 9E-13   |  |
| <i>Parabacteroides distasonis</i> | ATCC 8503        | -                                        | -                                   | 0%         | -         | -           | -       |  |
| <i>Proteus mirabilis</i>          | ATCC 29906       | ATCC 29906                               | EEI49344.1                          | 28%        | 610       | 231 (589)   | 1E-66   |  |

\* No genome sequence available for this strain so the sequence with greatest homology was used

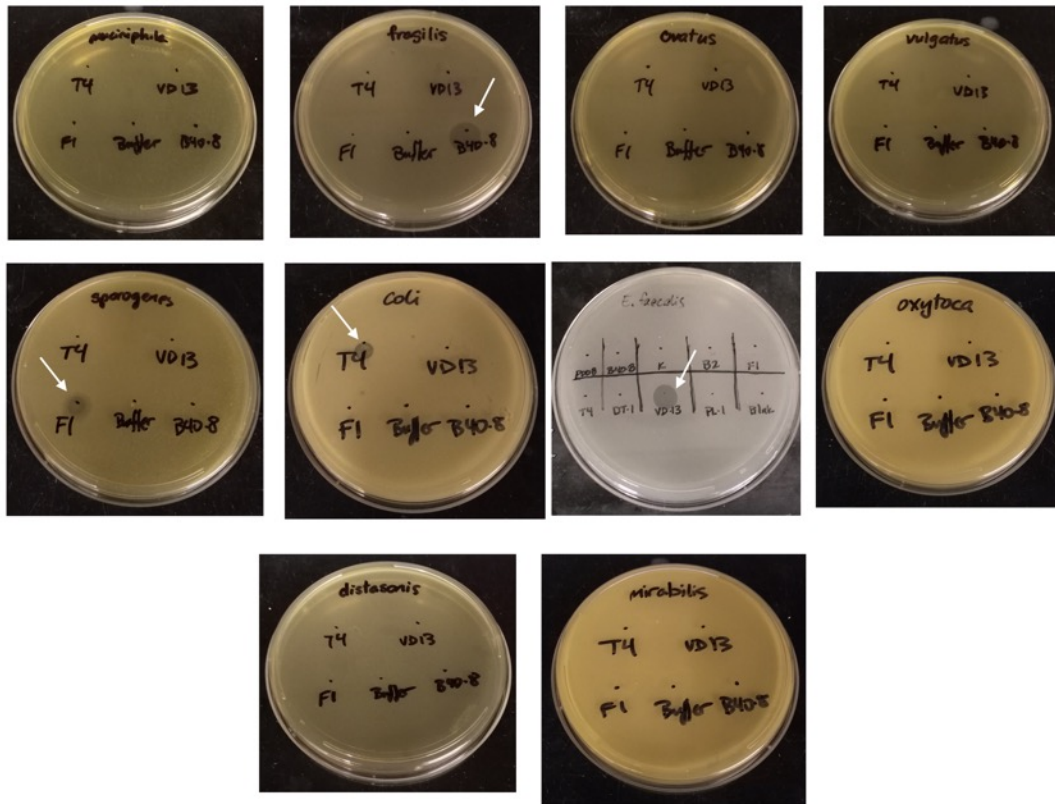

**Supplementary Figure S1 | Spot tests of phage against each bacteria in the defined consortia.**

Phages were spotted onto lawns of each bacteria and incubated anaerobically overnight 37°C. Zones of clearing indicated infectivity.

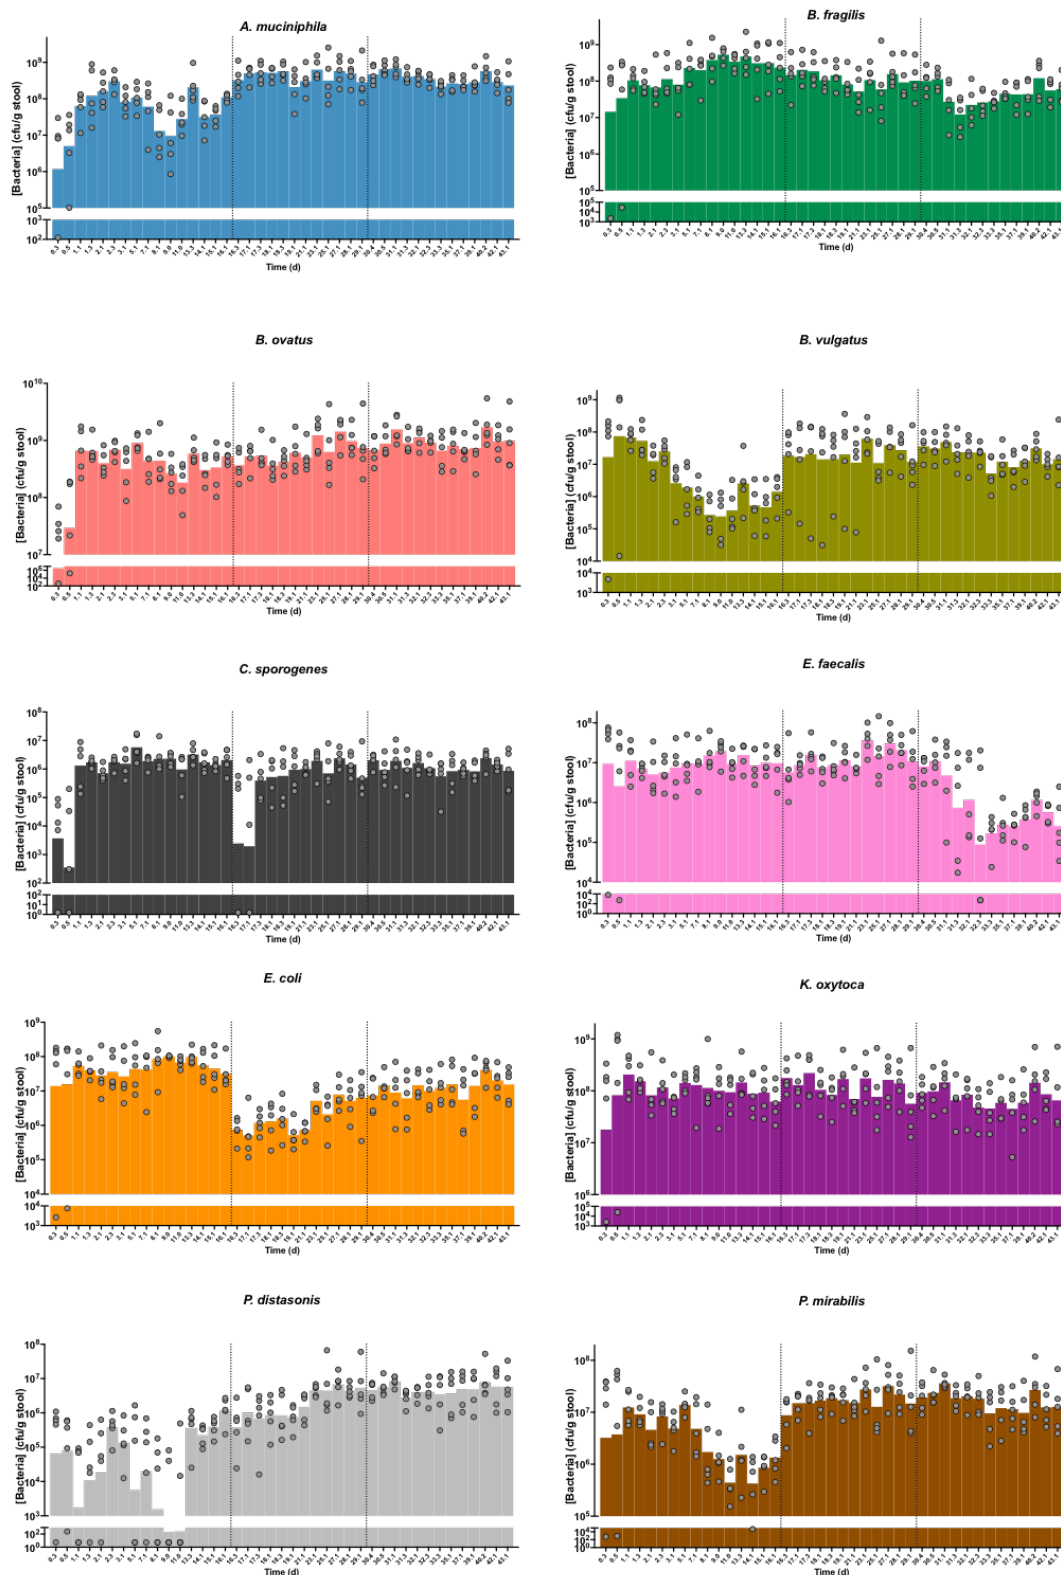

**Supplementary Figure S2 | Fecal bacterial concentrations of each strain over time.**

Concentrations of each strain for each mouse is represented by each circle while the geometric means are shown as bars. Vertical dashes represent administration of T4 and F1 phages, then B40-8 and VD13 phages, respectively.

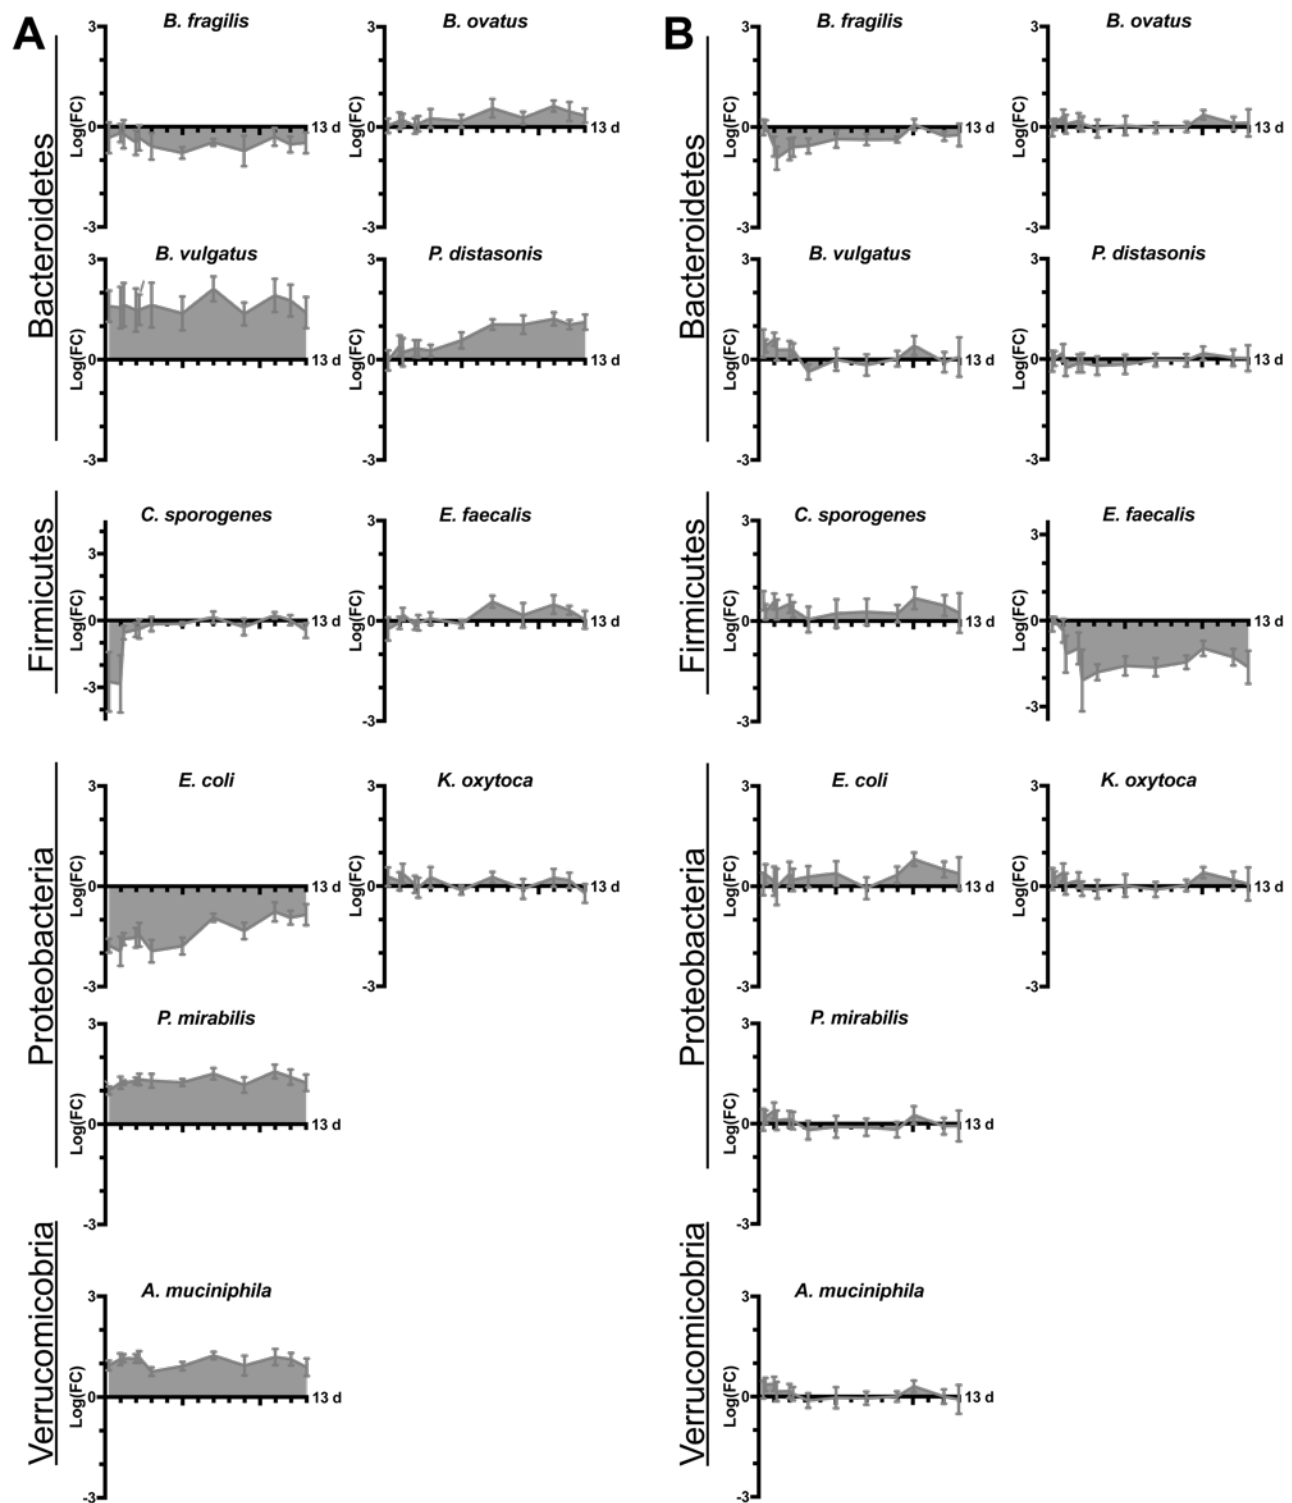

**Supplementary Figure S3 | Relative change of each strain after phage perturbation.** Relative fecal concentrations of each bacteria over time after perturbation by phages (A) T4 and F1 phages targeting *E. coli* and *C. sporogenes*, respectively, and (B) VD13 and B40-8 phages targeting *E. faecalis* and *B. fragilis*, respectively.

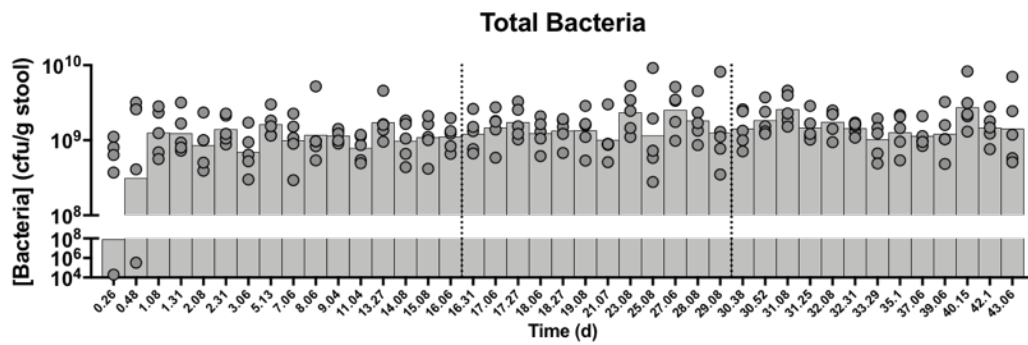

**Supplementary Figure S4 | Total fecal bacteria over time.** Concentration of fecal bacteria for each mouse is represented by each circle while the geometric means are shown as bars. Vertical dashes represent administration of T4 and F1 phages, then B40-8 and VD13 phages, respectively.

A

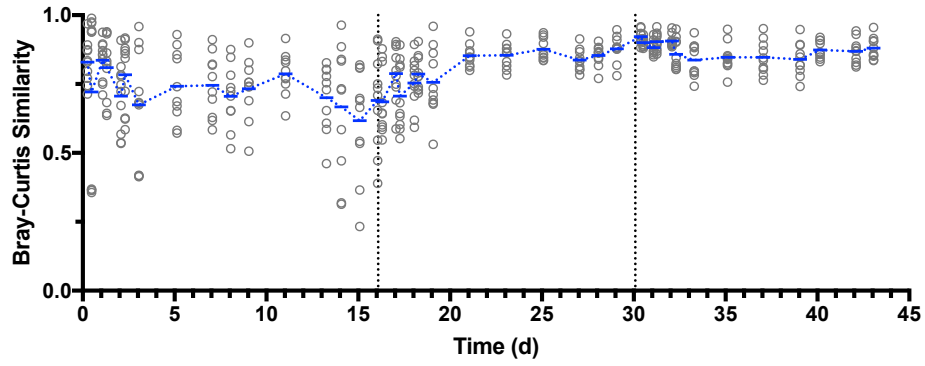

B

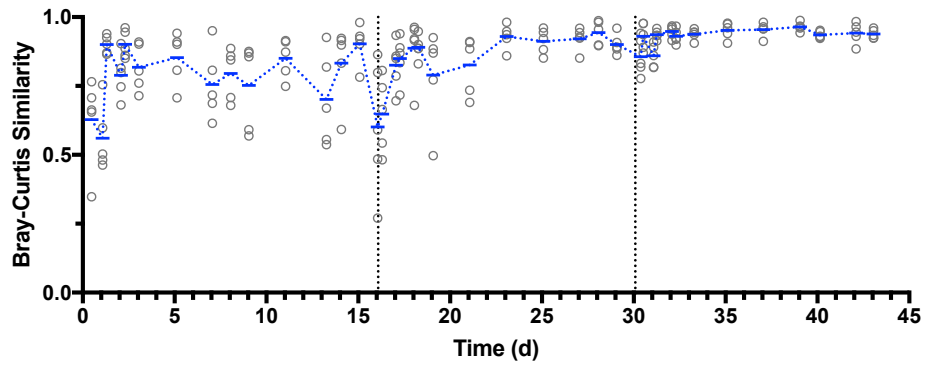

**Supplementary Figure S5 | Bray-Curtis measures of similarity.** The similarity in bacterial microbiota compositions was determined (A) between mice and (B) between timepoints.

1

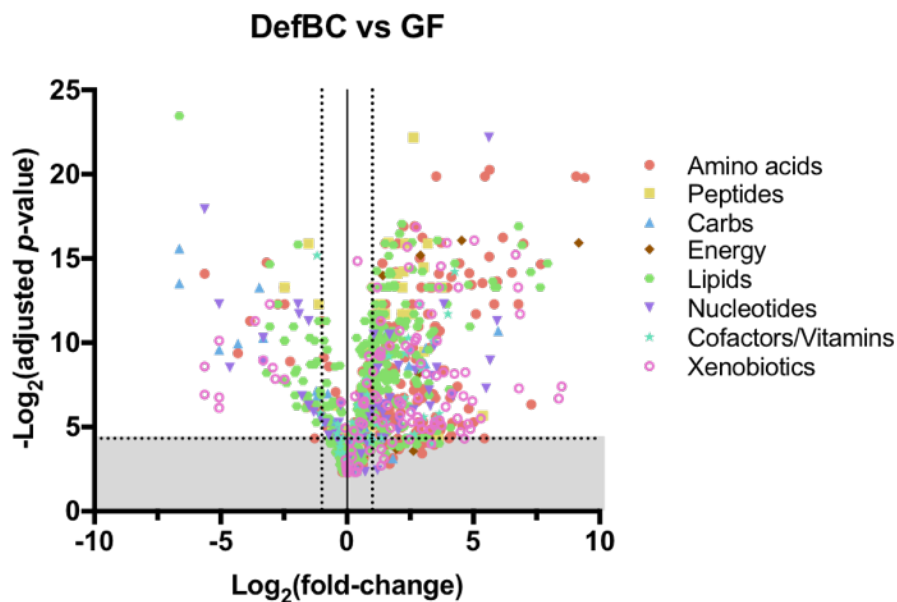

2

3

4 **Supplementary Figure S6 | Volcano plot of the effect of bacterial colonization on the fecal**  
5 **metabolome.** Points above the horizontal dashed line indicate significant changes with adjusted  $p$ -  
6 values  $< 0.05$ .

7

8

9
